# Supplementary material for: Spectrofluorimetric and Computational Investigation of New Phthalimide Derivatives towards Human Neutrophil Elastase Inhibition and Antiproliferative Activity
Source: MDPI journal article supplement (doi:10.3390/ijms24010110), 2022-12-21

## Supporting Information

### Spectrofluorimetric and computational investigation of new phthalimide derivatives towards human neutrophil elastase inhibition and antiproliferative activity

Beata Donarska<sup>1</sup>, Marta Świtalska<sup>2</sup>, Joanna Wietrzyk<sup>2</sup>, Wojciech Plaziński<sup>3,4</sup>, Krzysztof Z. Łączkowski<sup>1\*</sup>

<sup>1</sup>Department of Chemical Technology and Pharmaceuticals, Faculty of Pharmacy, Collegium Medicum, Nicolaus Copernicus University, Jurasza 2, 85-089 Bydgoszcz, Poland,

<sup>2</sup>Hirszfeld Institute of Immunology and Experimental Therapy, Polish Academy of Sciences, Rudolfa Weigla 12, 53-114 Wrocław, Poland,

<sup>3</sup>Jerzy Haber Institute of Catalysis and Surface Chemistry, Polish Academy of Sciences, Niezapominajek 8, 30-239, Cracow, Poland

<sup>4</sup>Department of Biopharmacy, Medical University of Lublin, Chodzki 4a, 20-093 Lublin, Poland

\*Corresponding author: krzysztof.laczkowski@cm.umk.pl

#### Product 4a

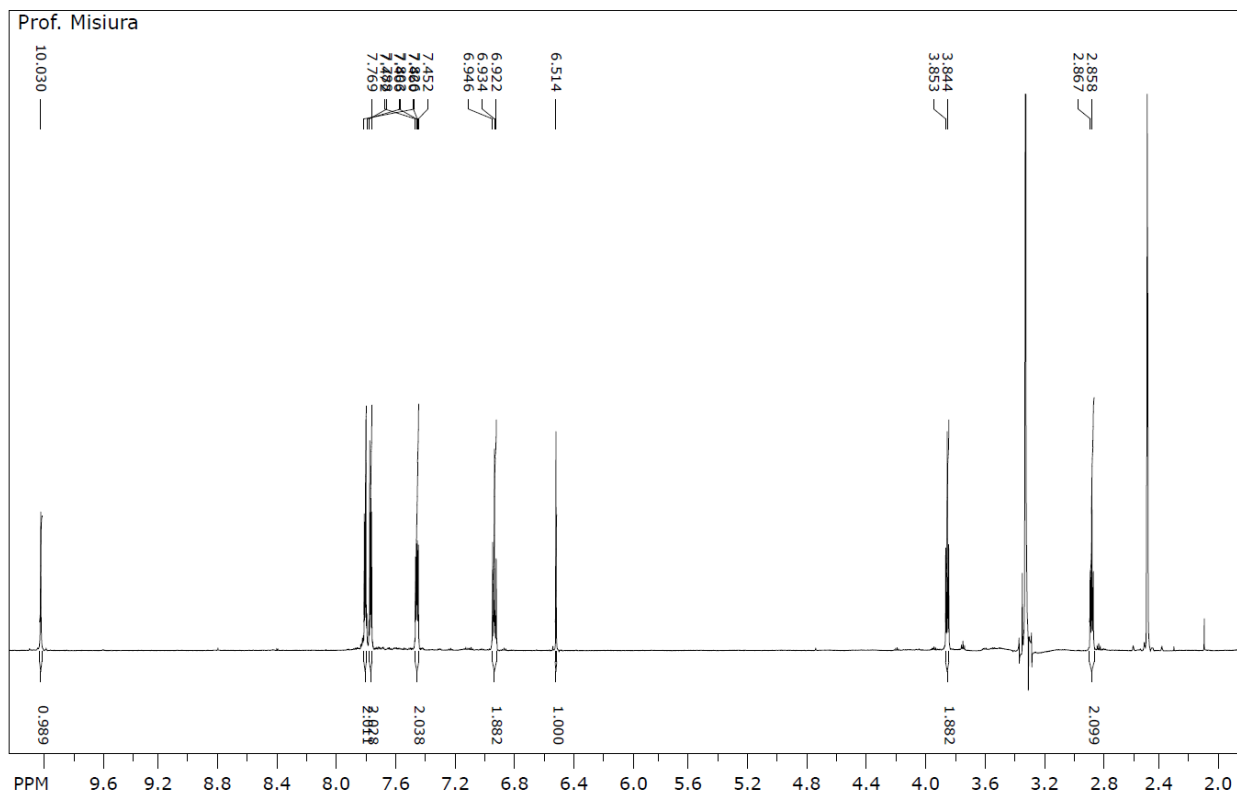

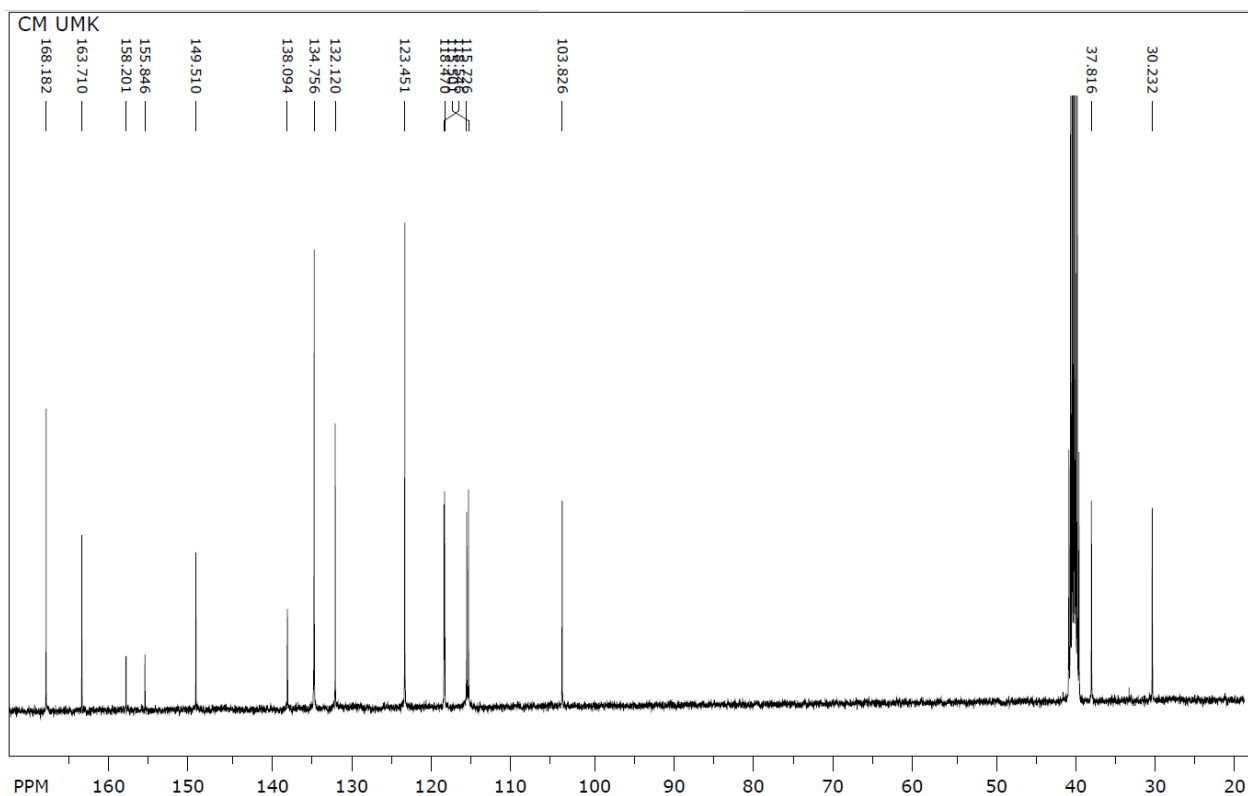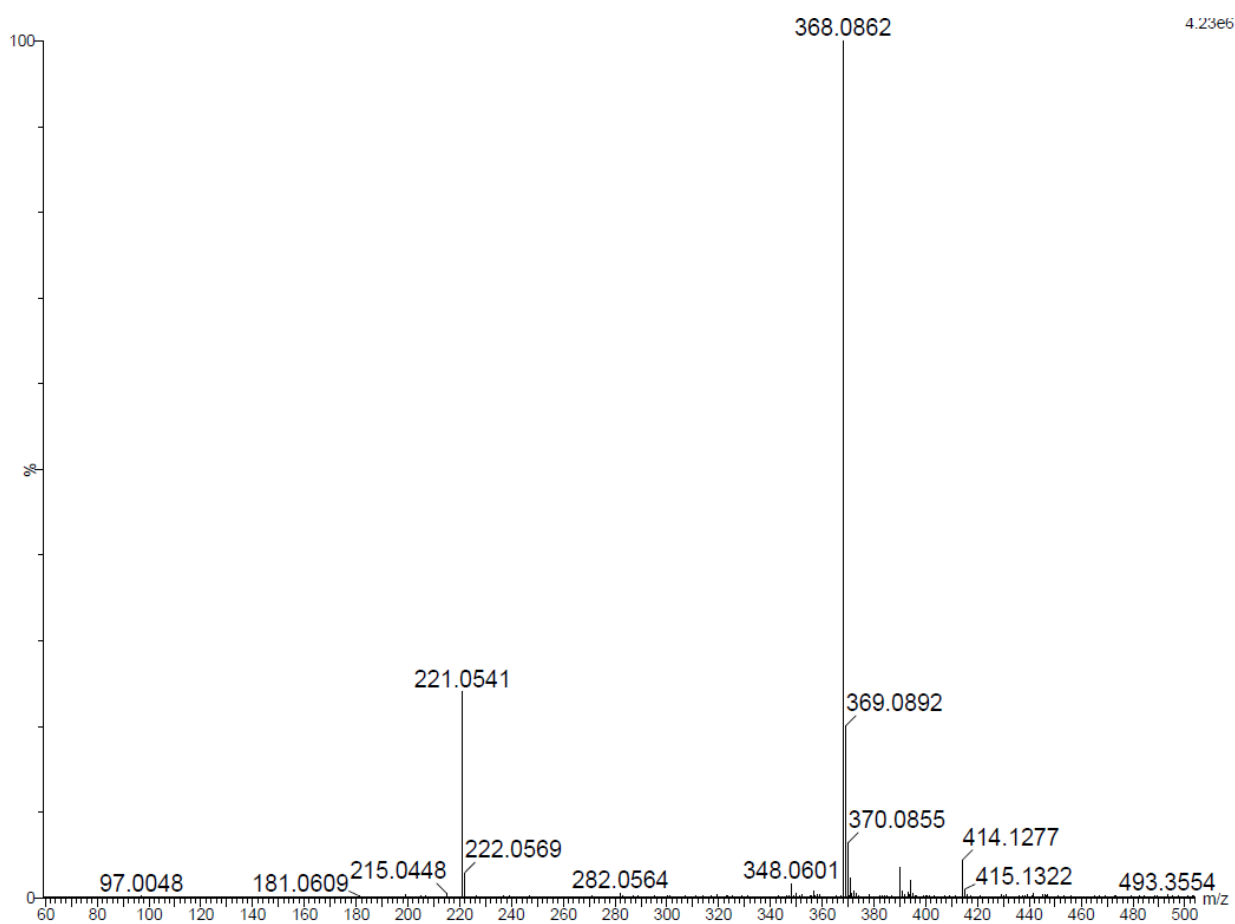

# Product **4b**

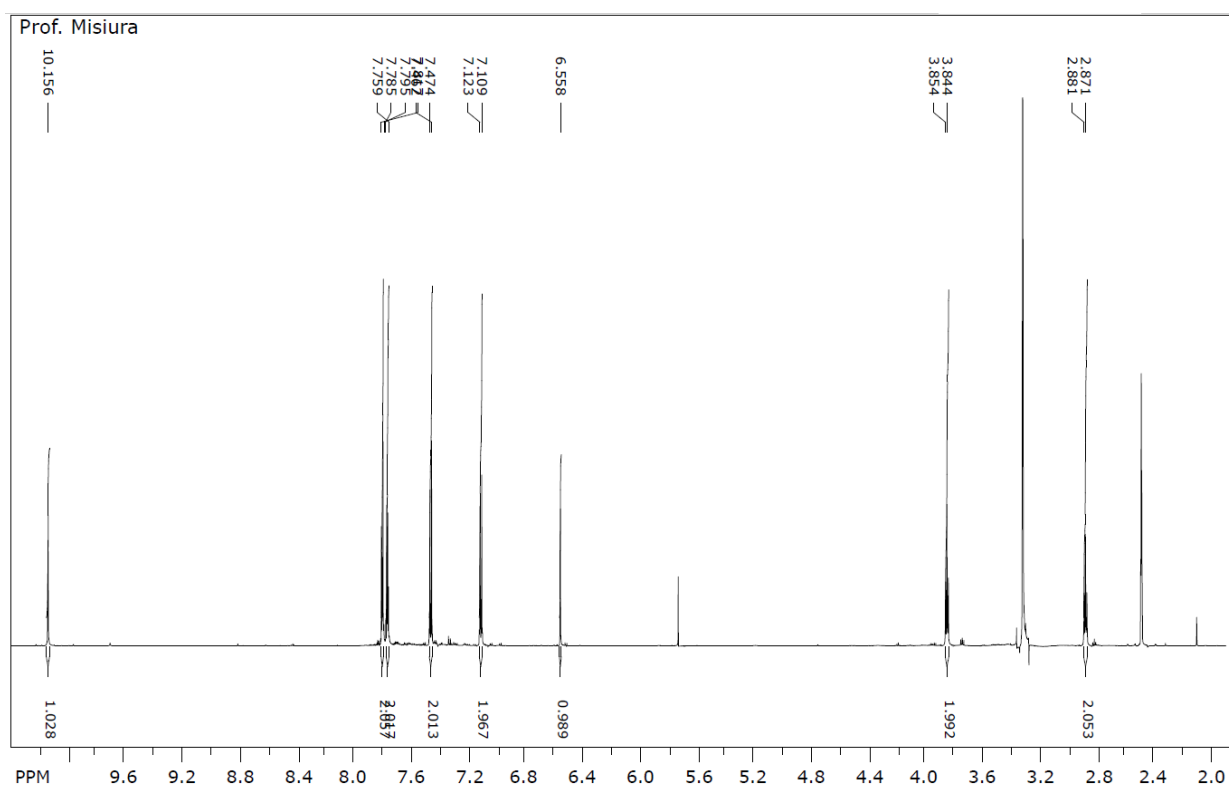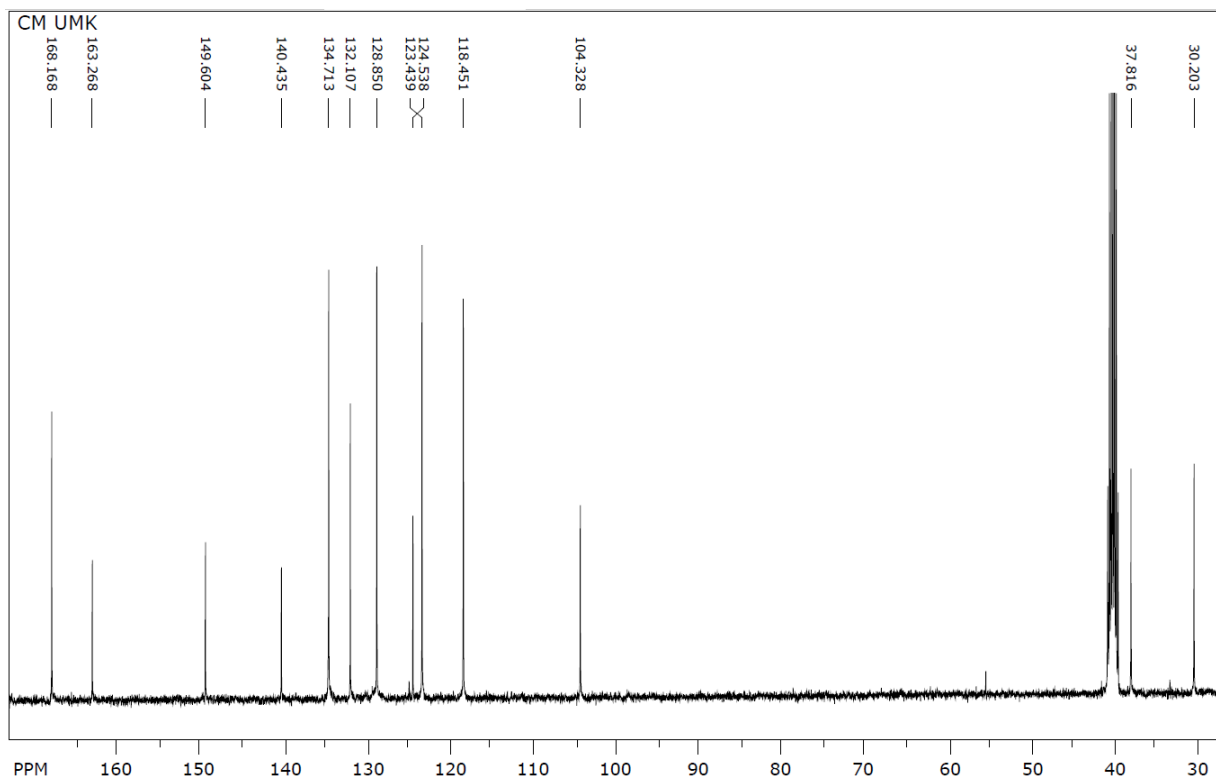

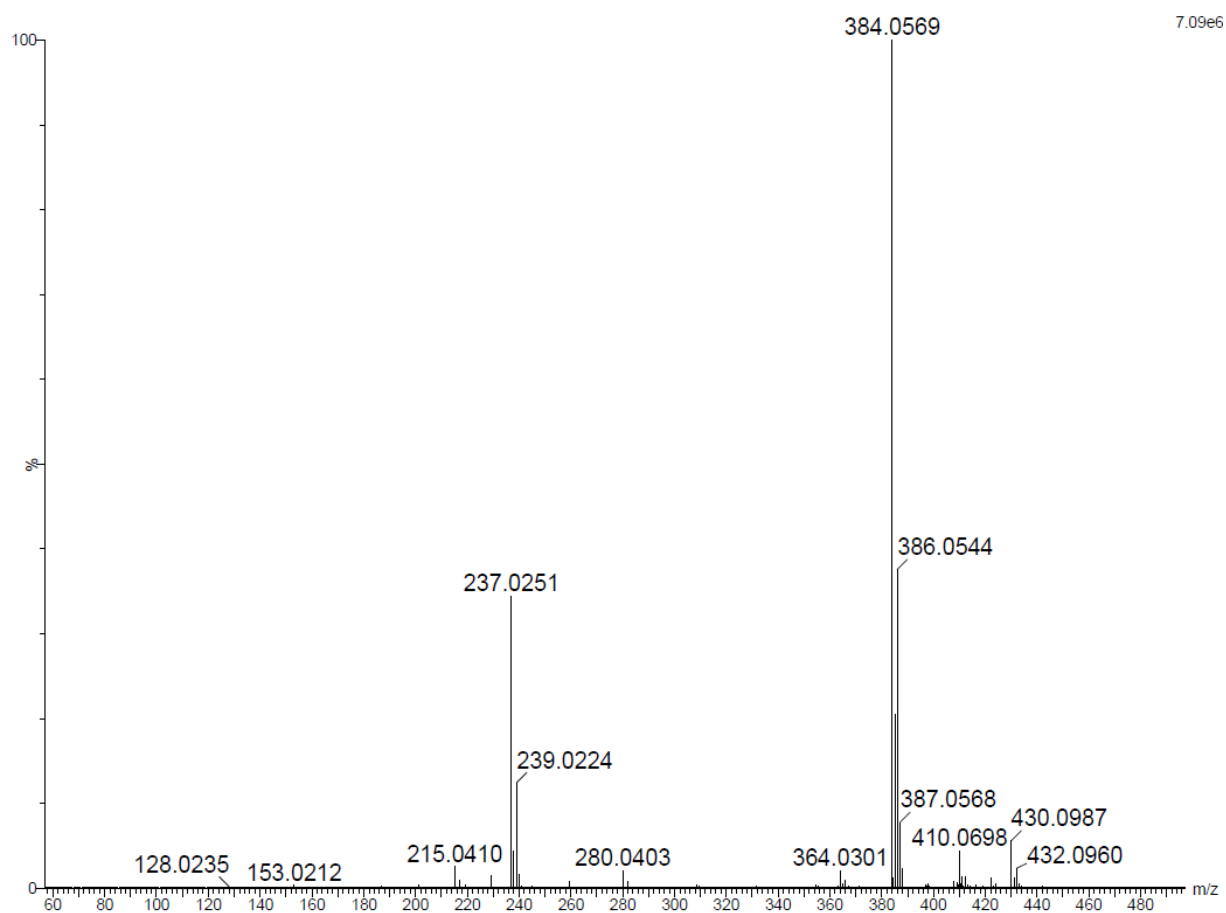

### Product 4c

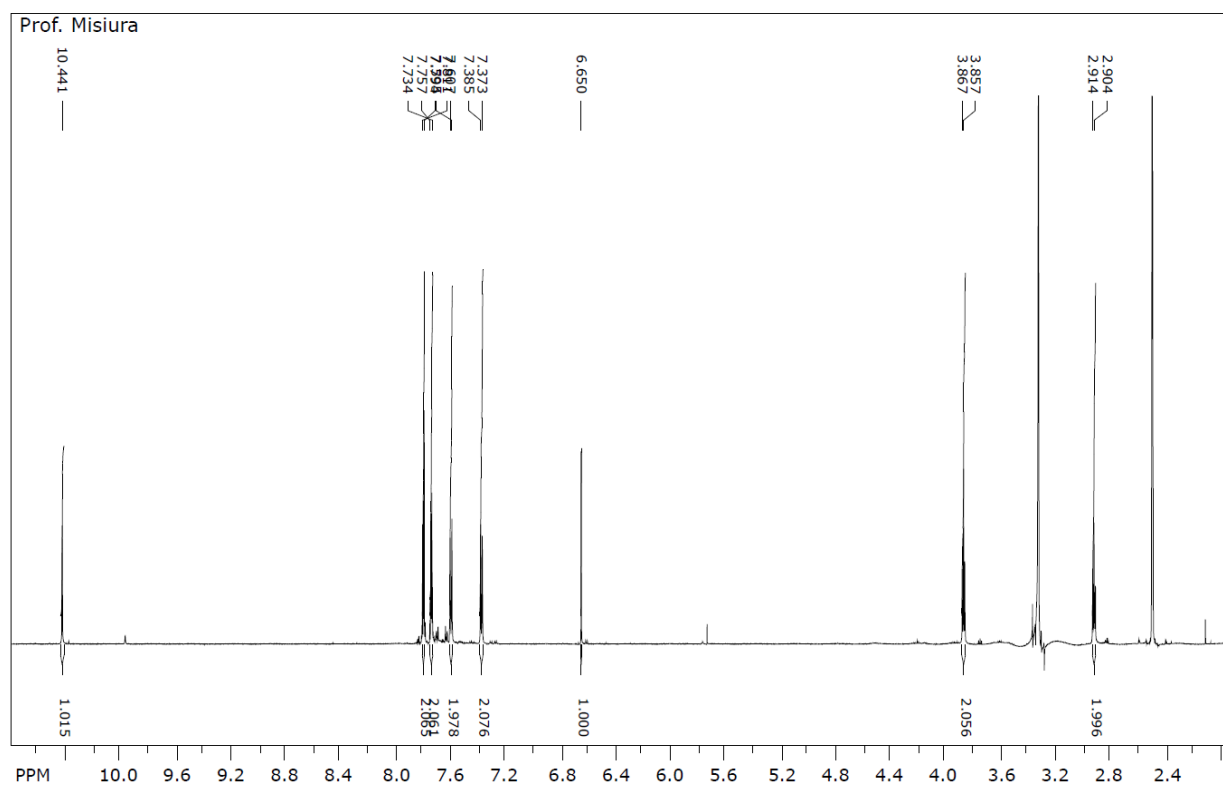

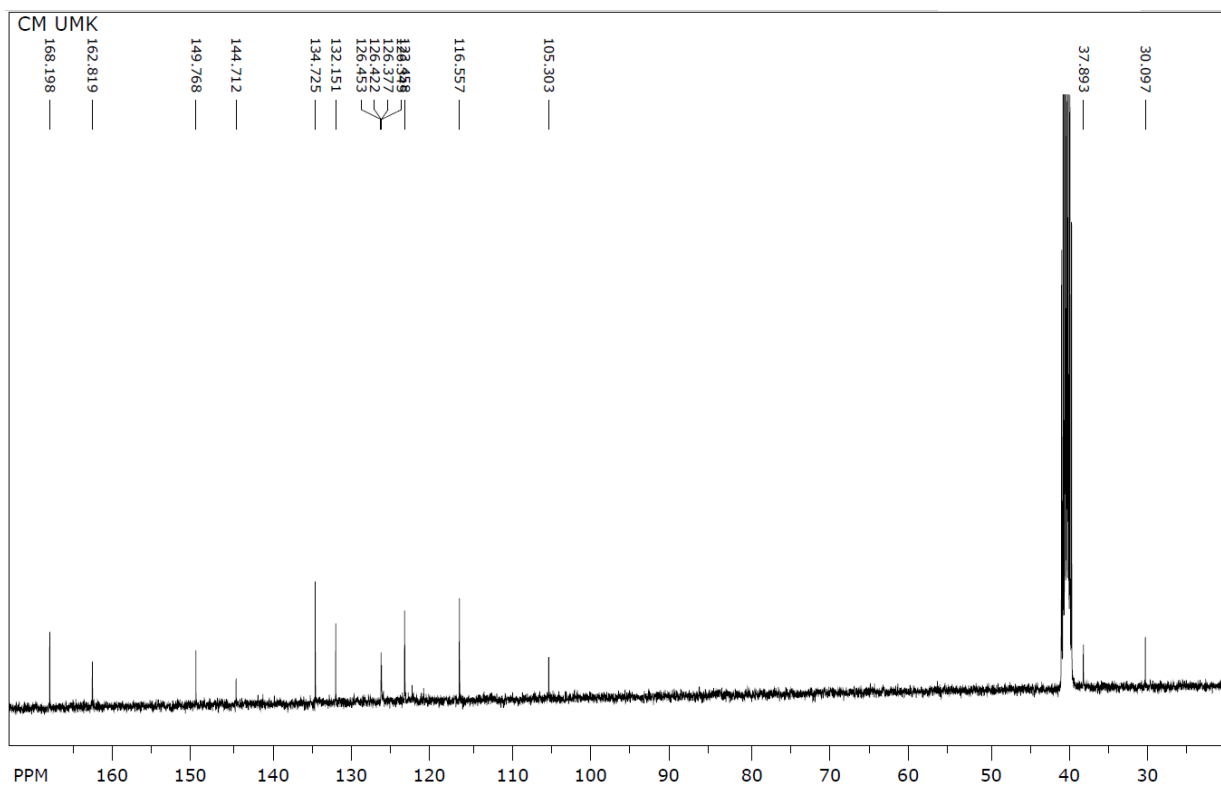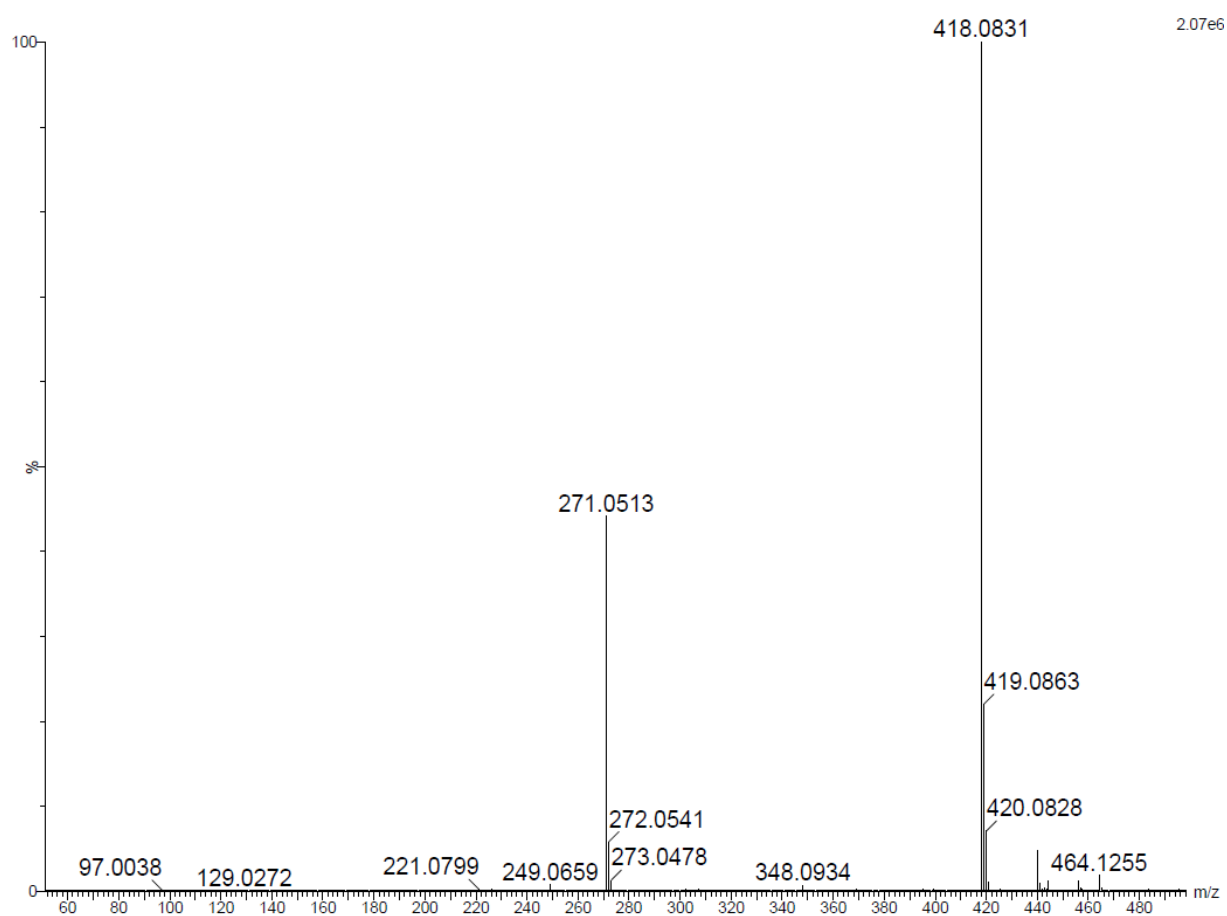

Product **4d**

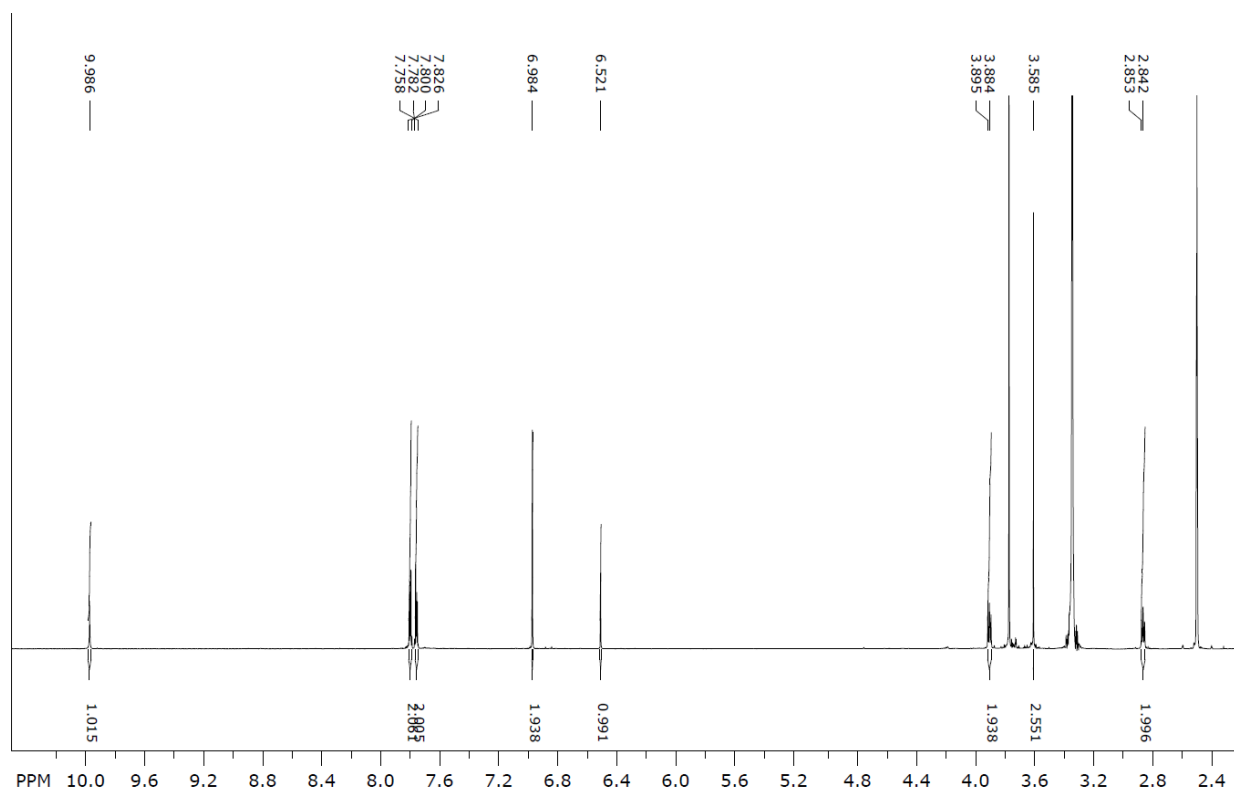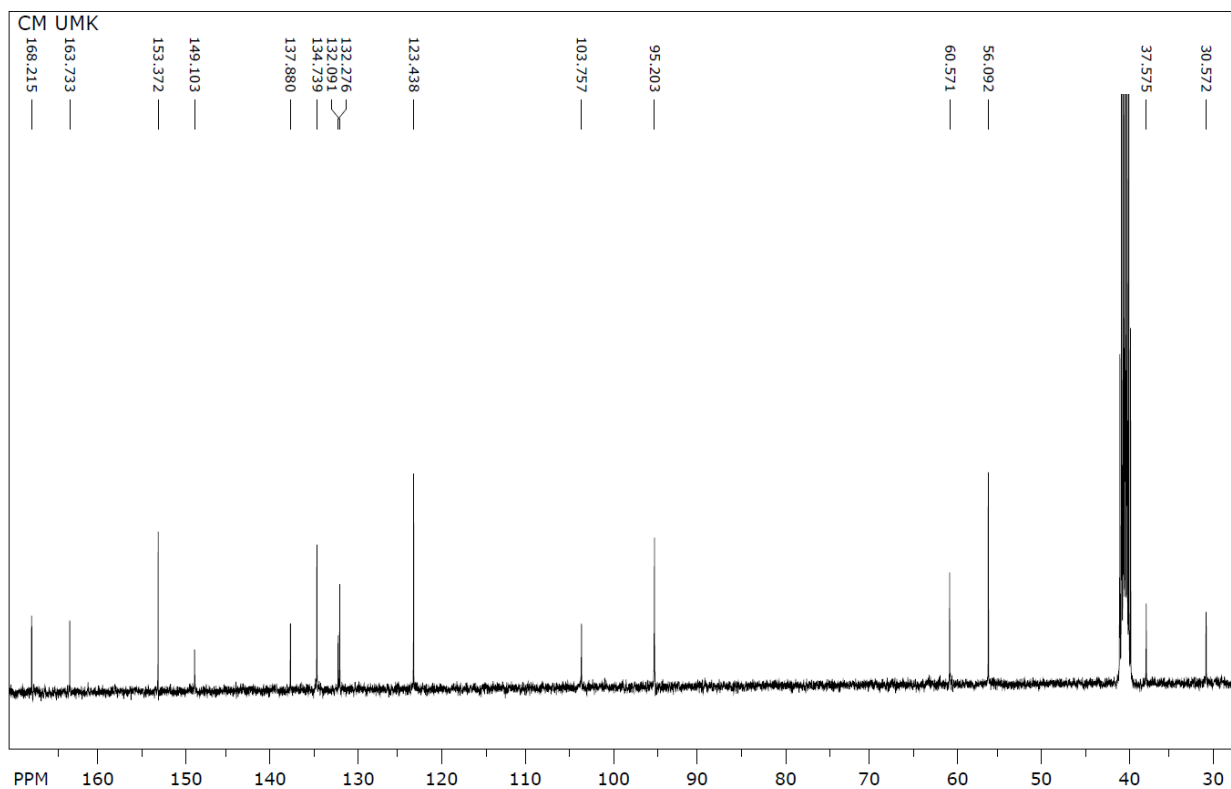

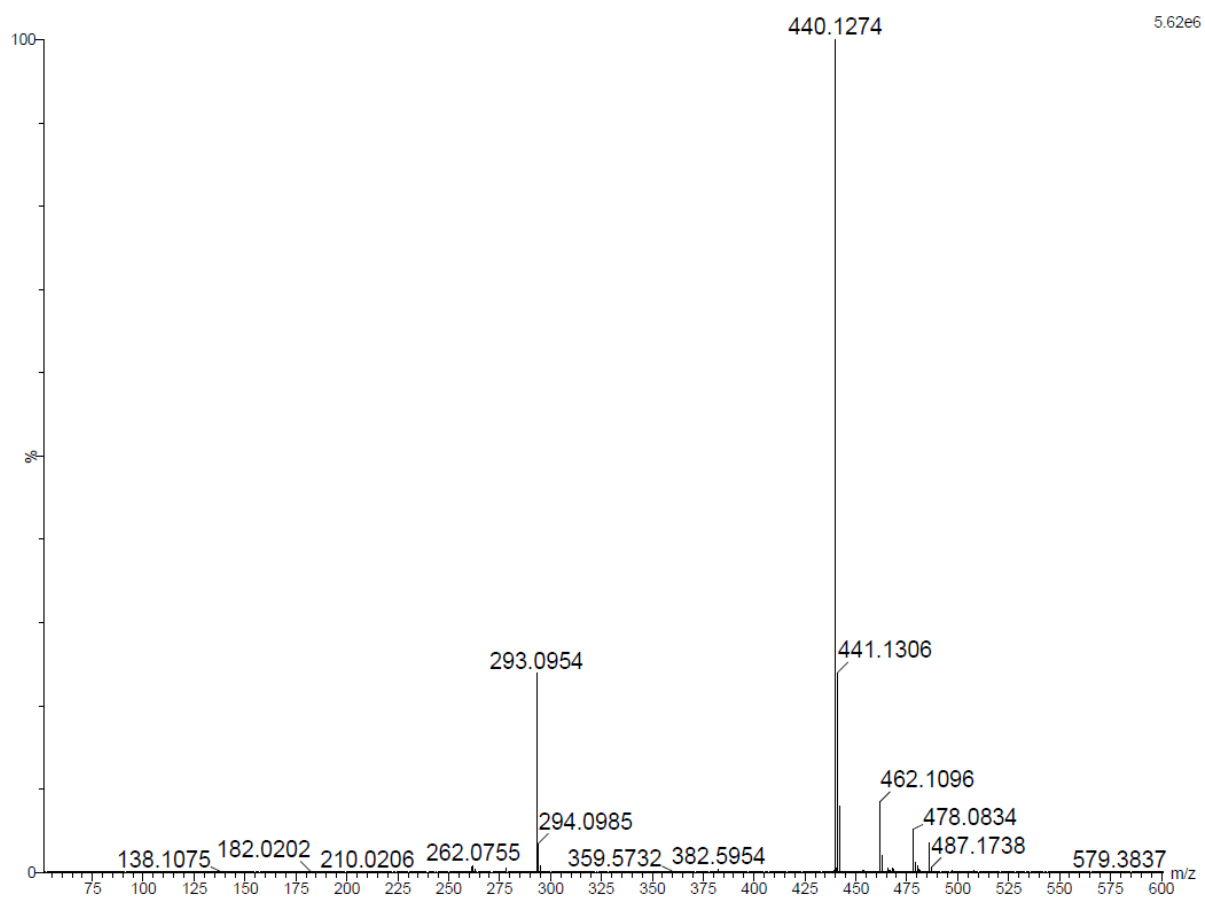

Product 4e

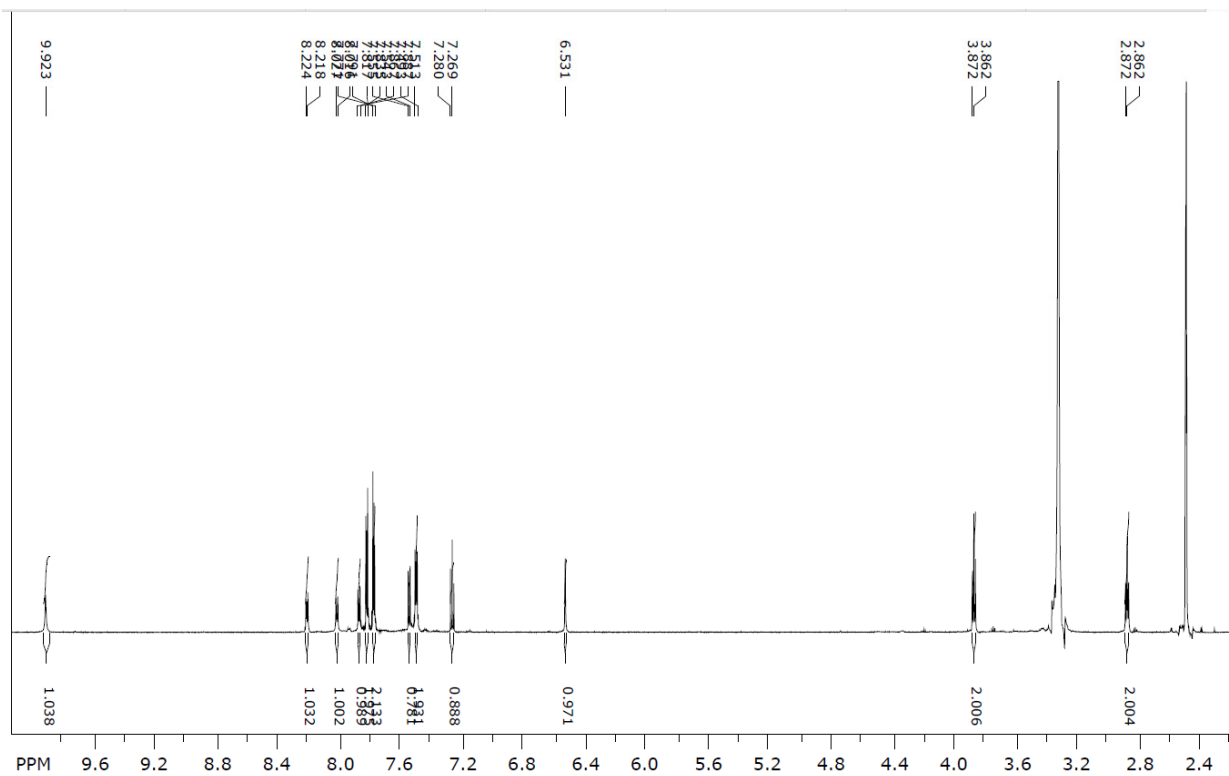

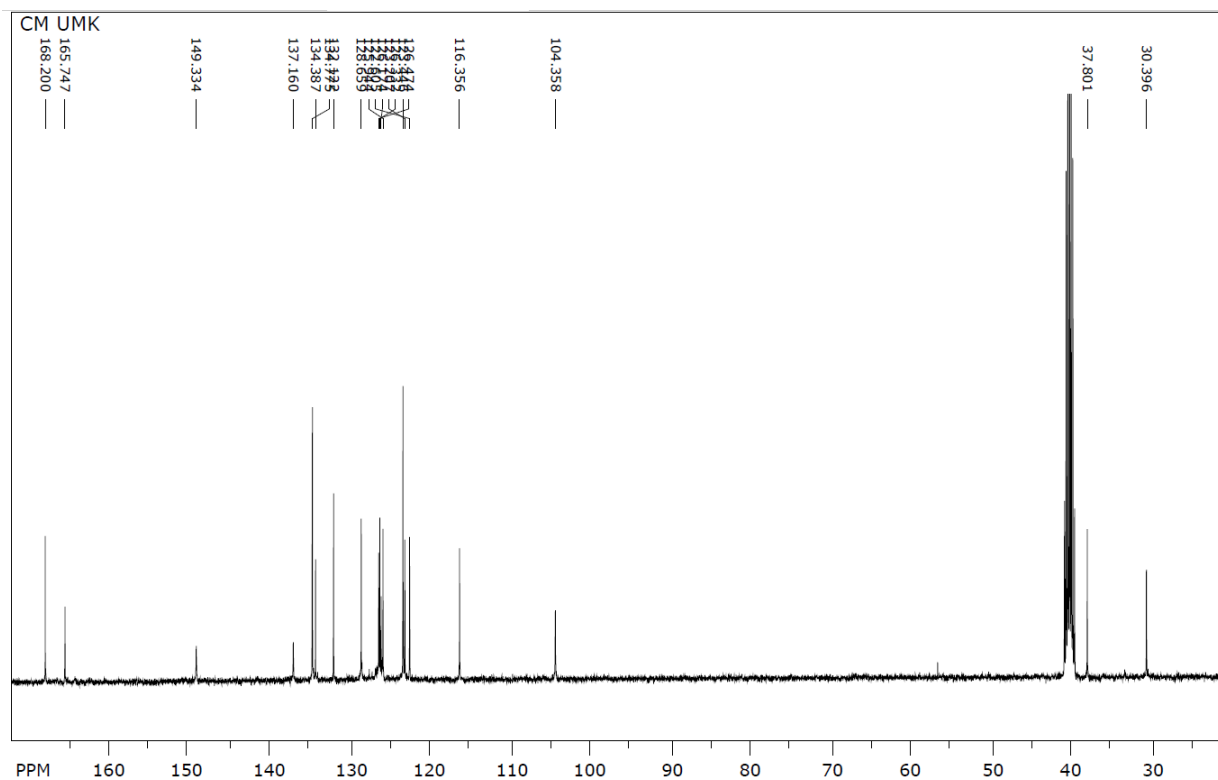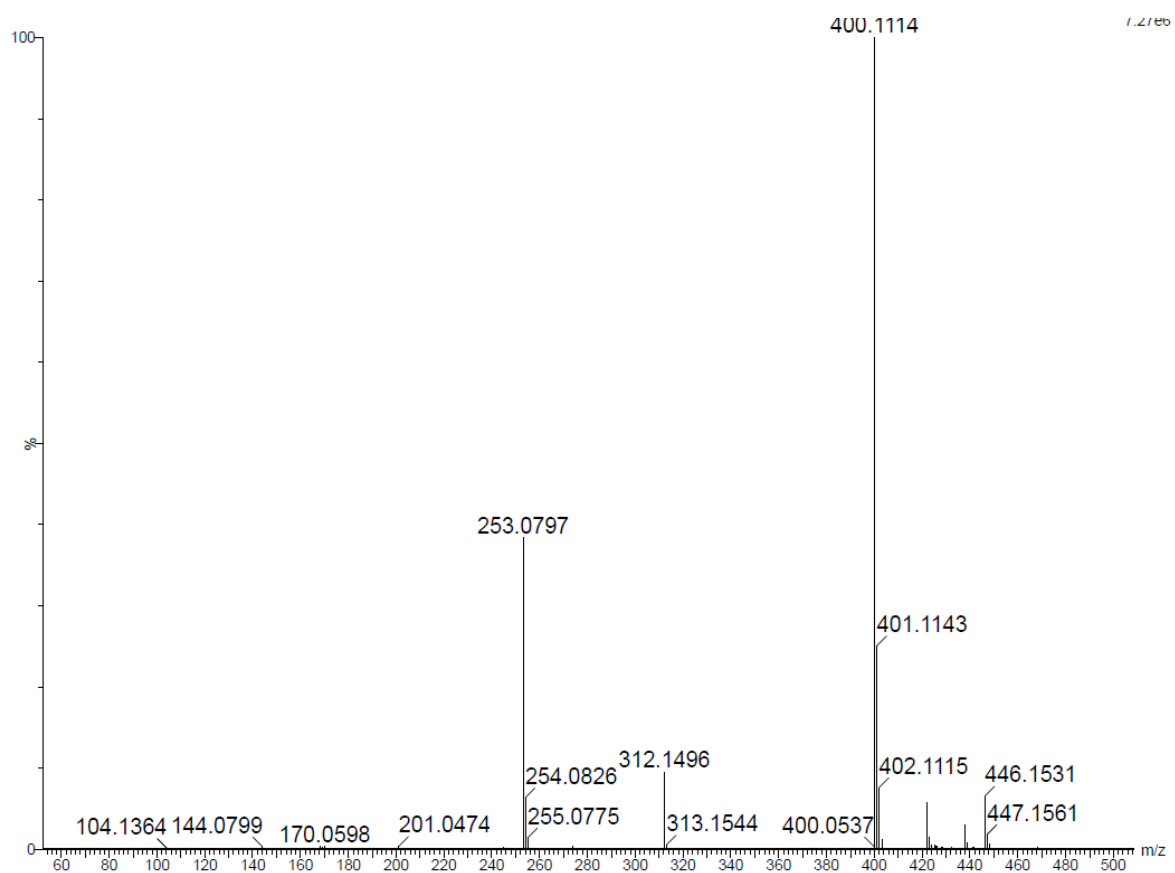



Product **4f**

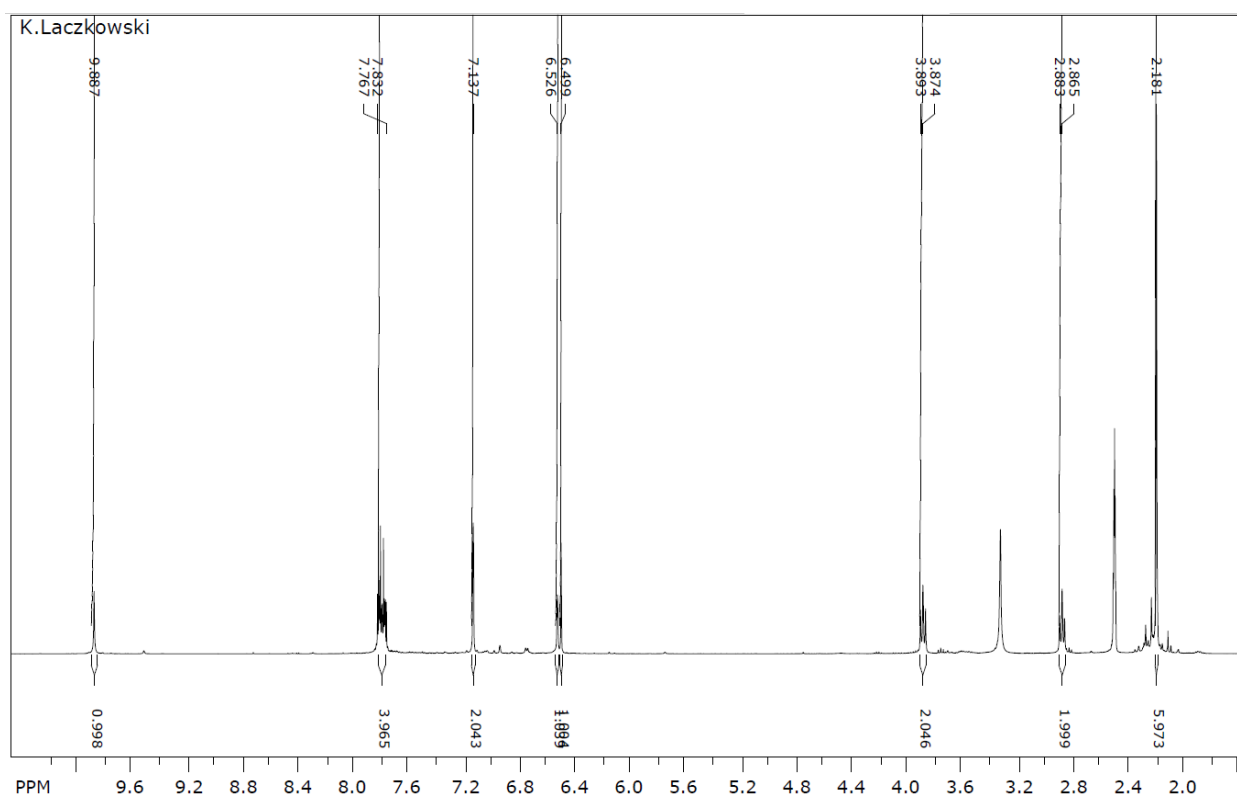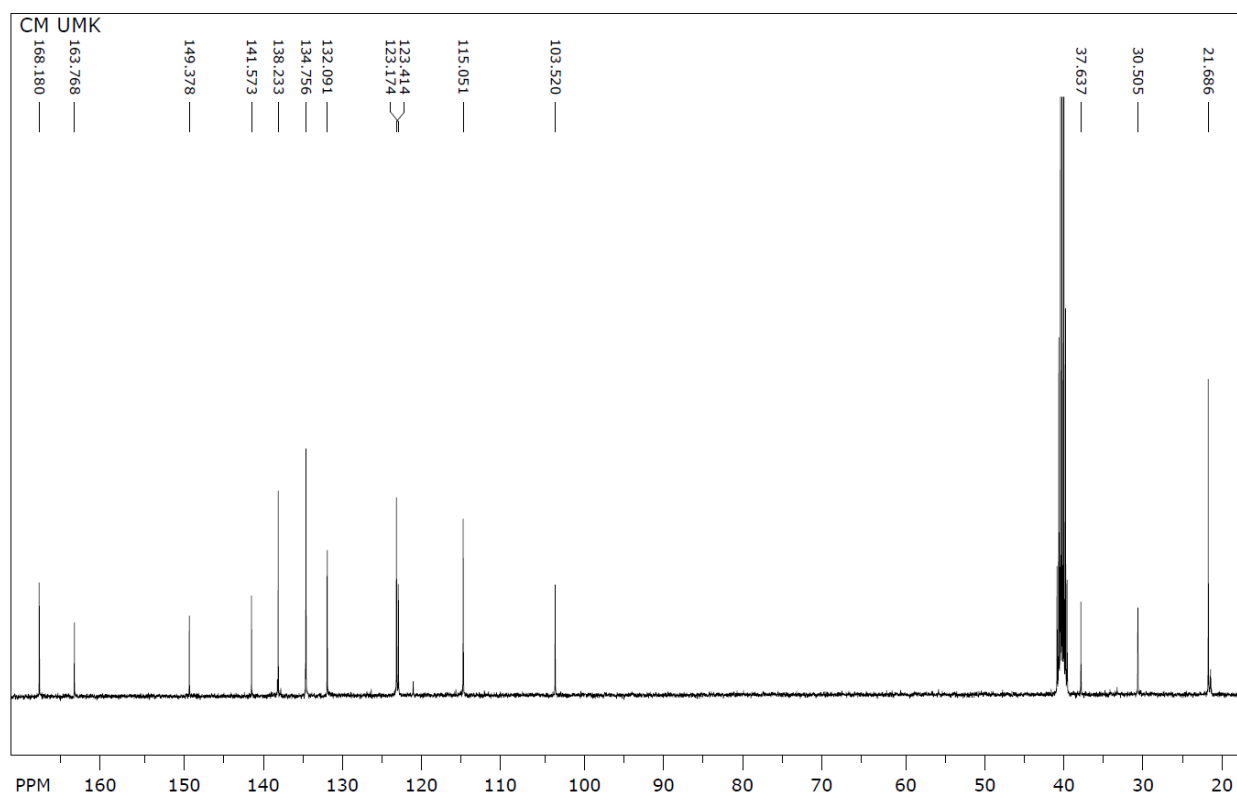

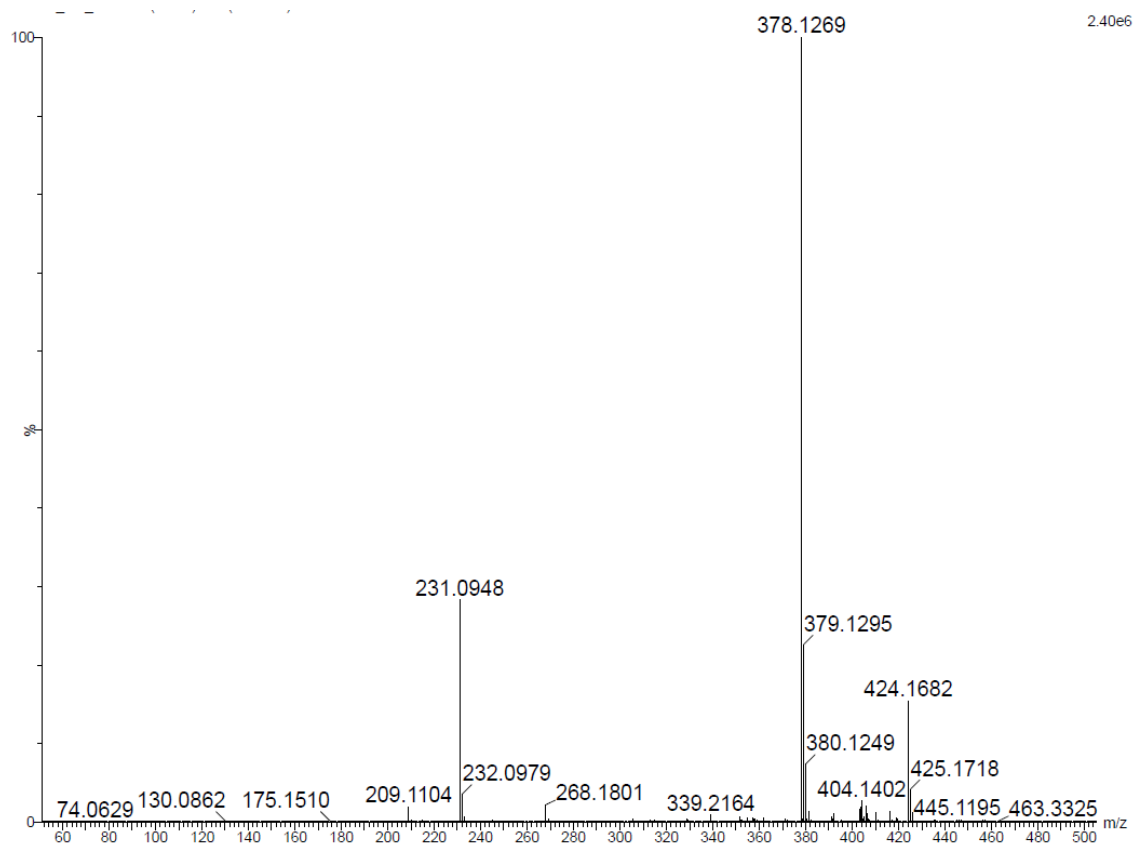

Product 4g

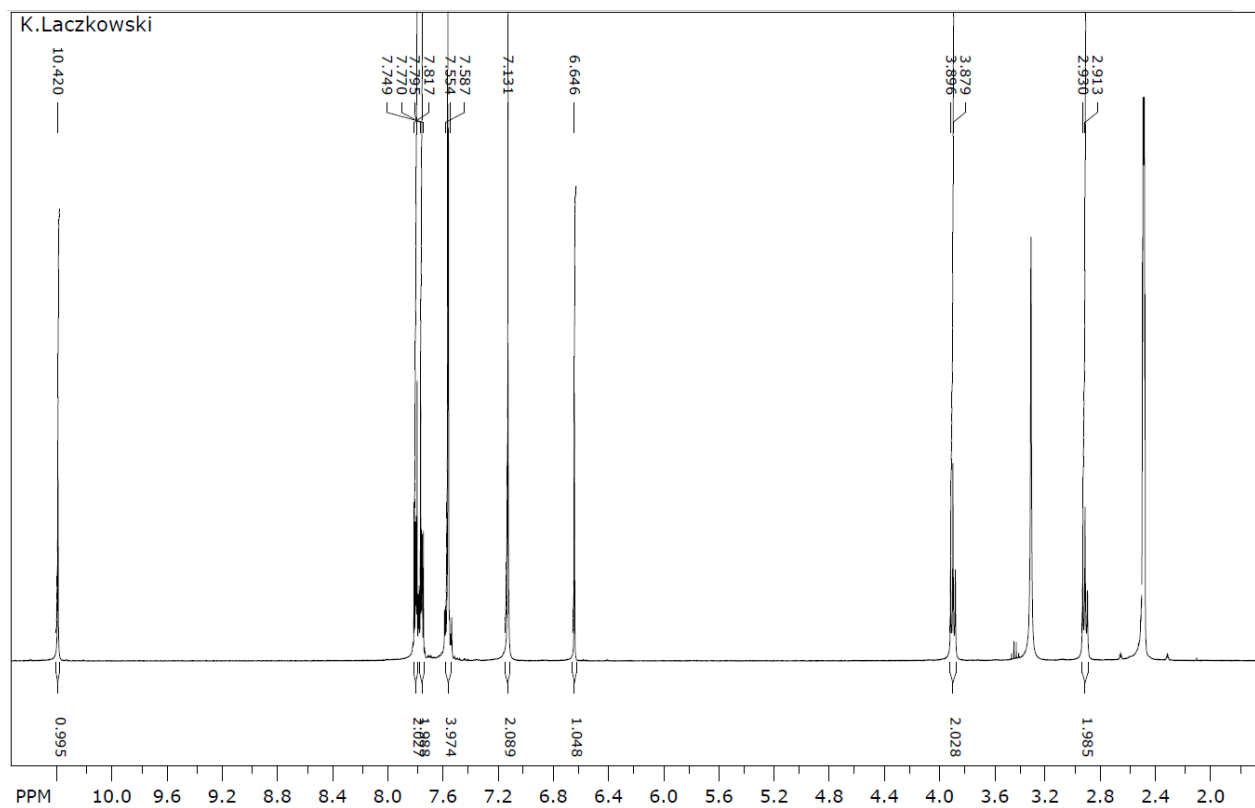

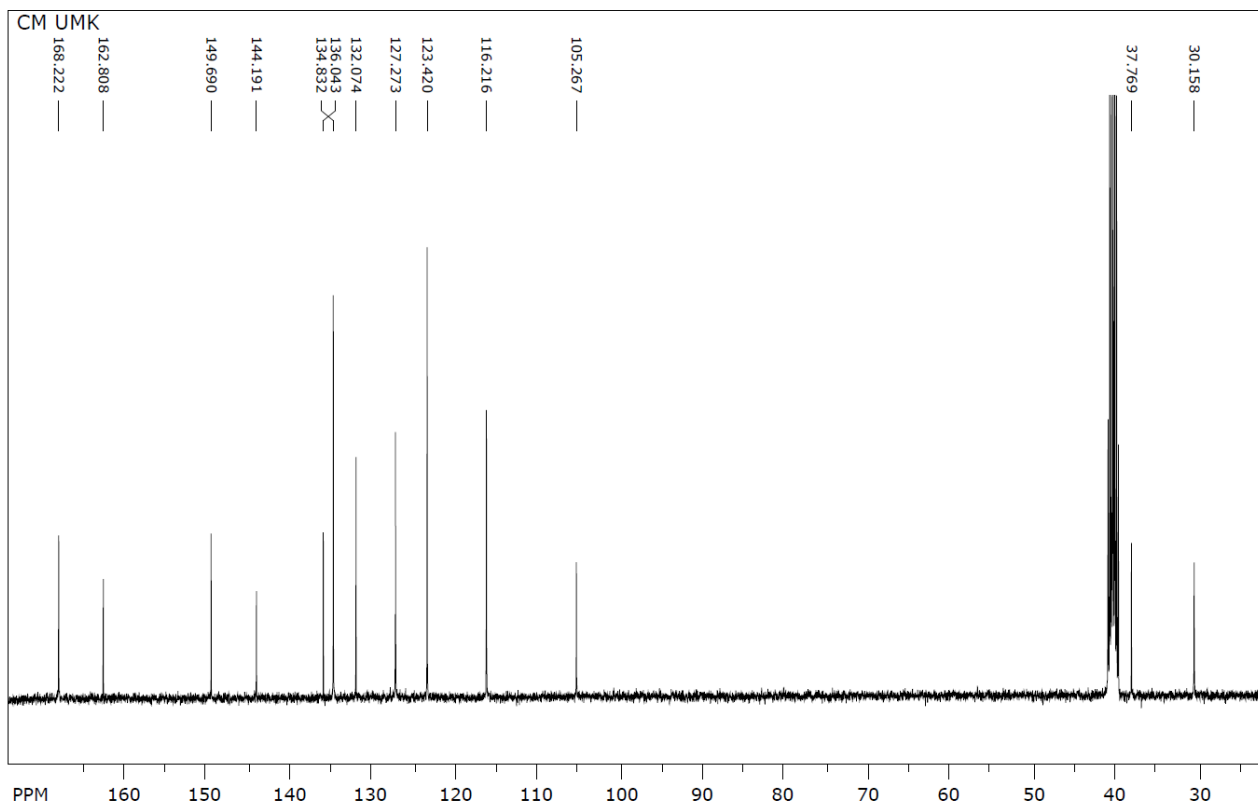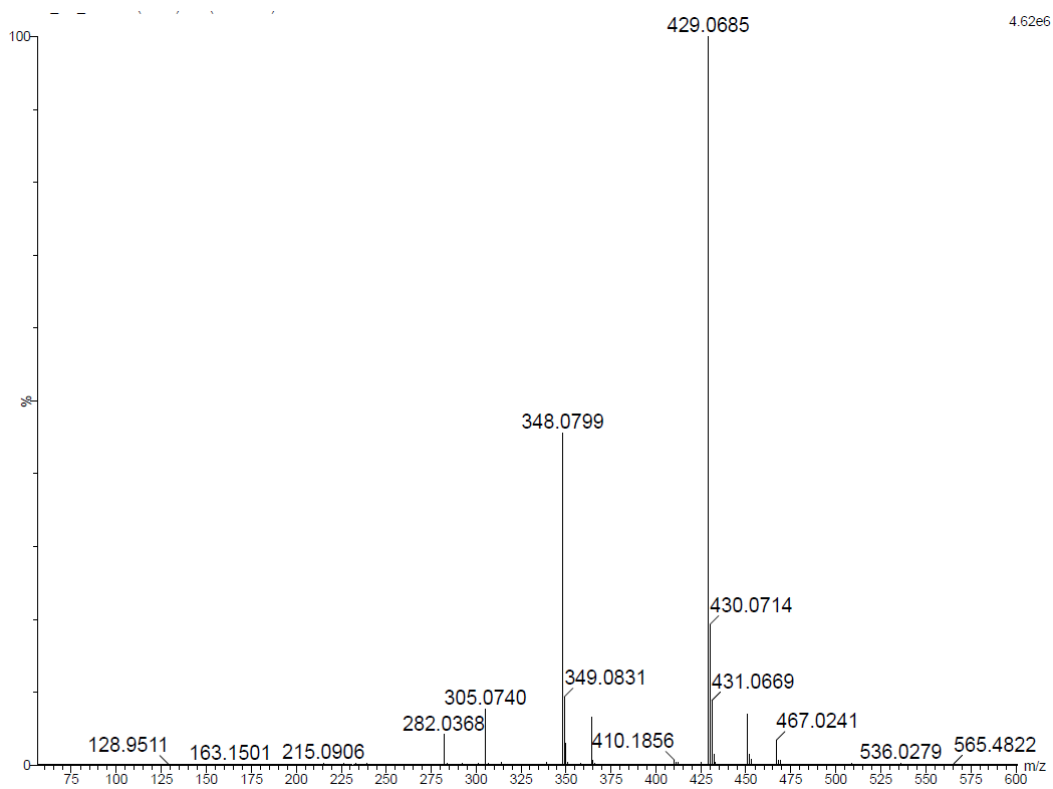

Product **4h**

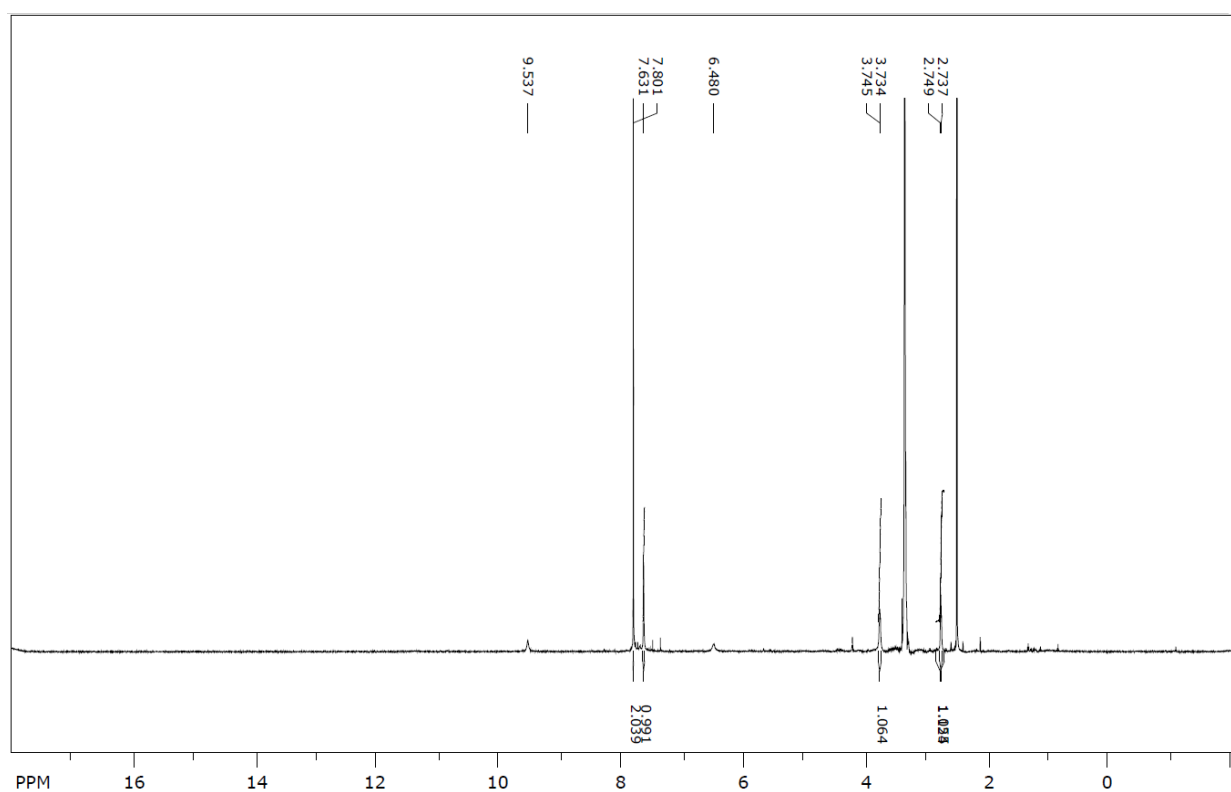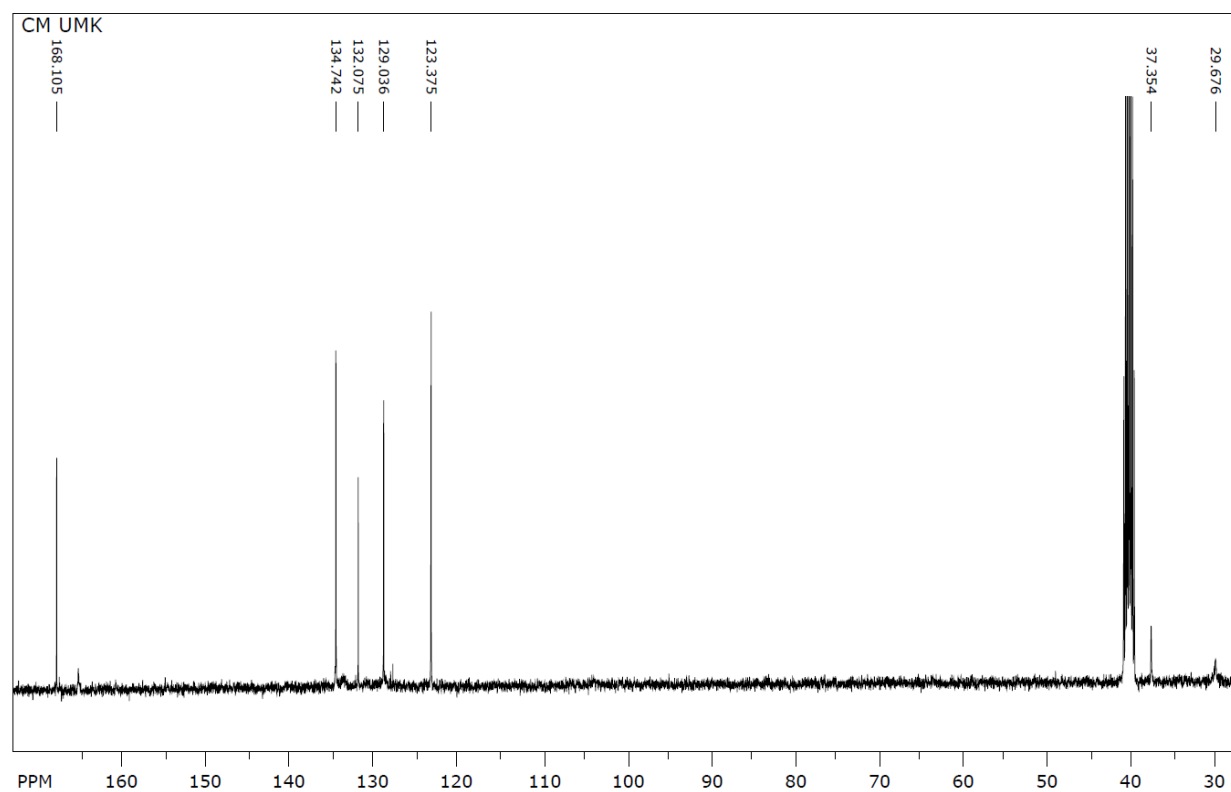

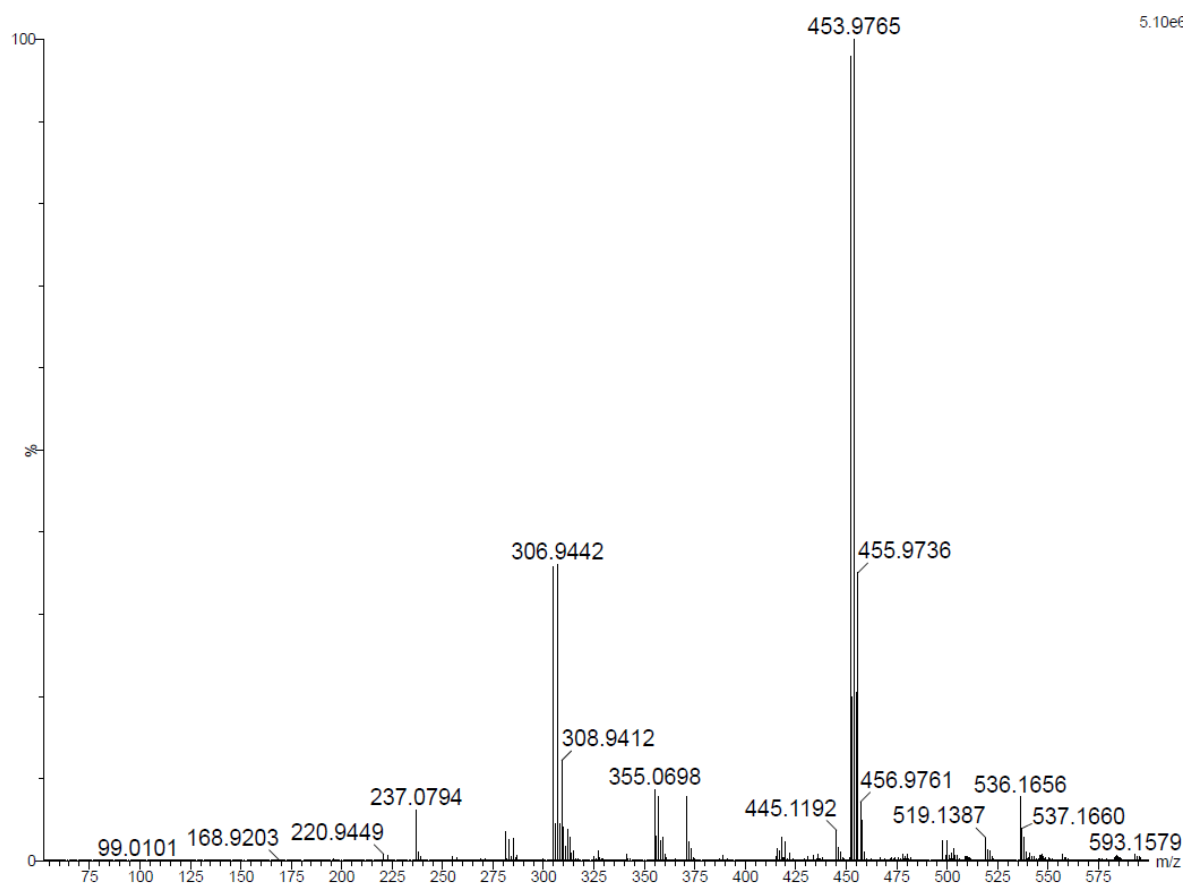

# Product **4i**

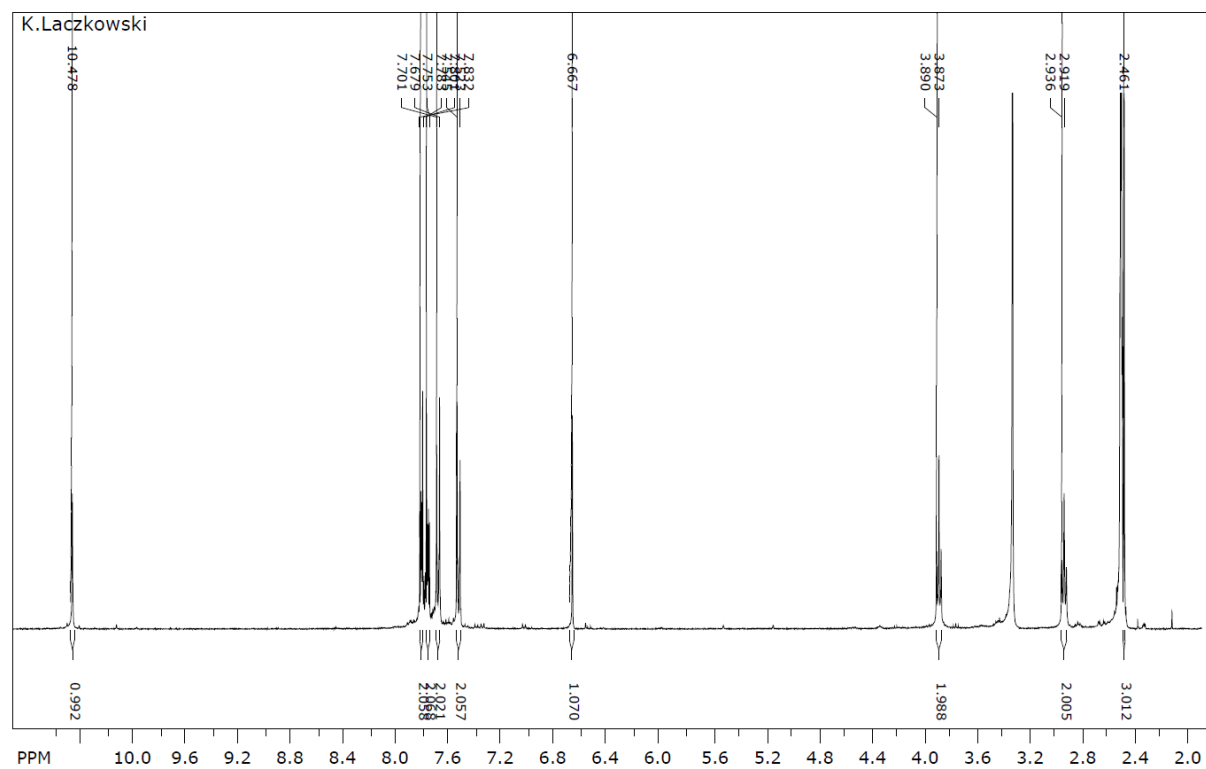

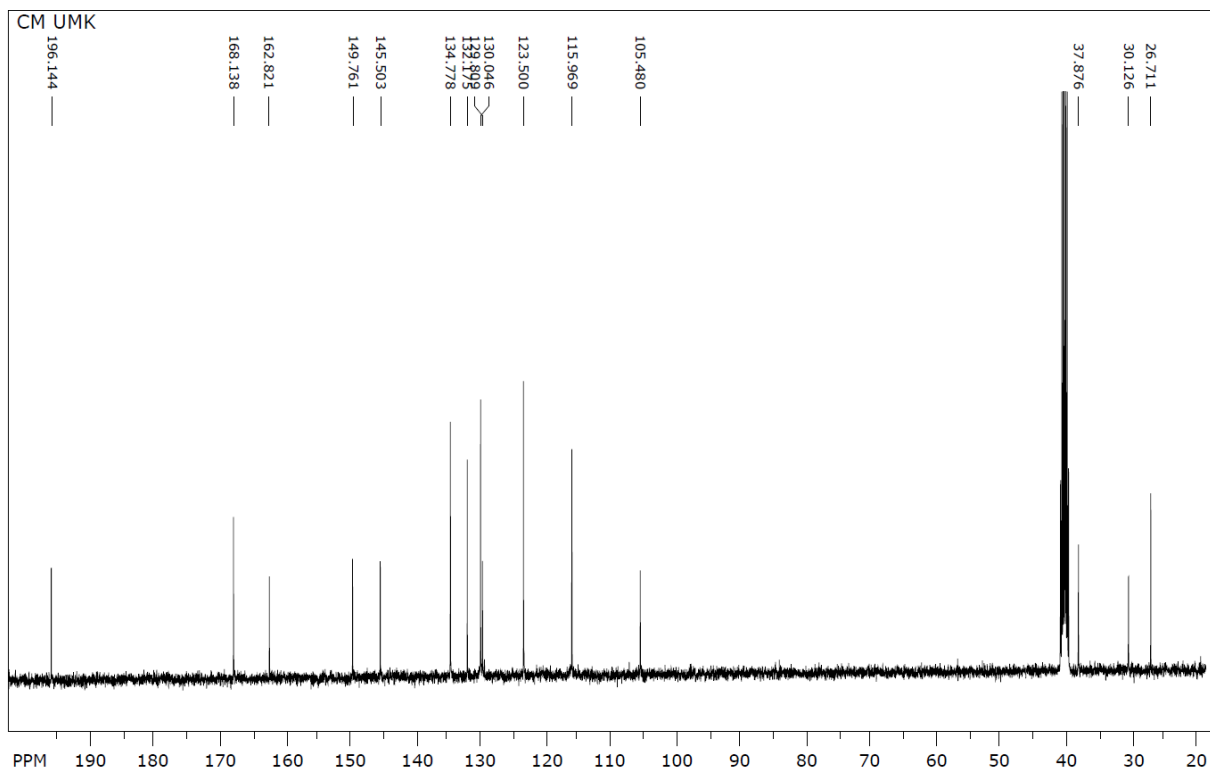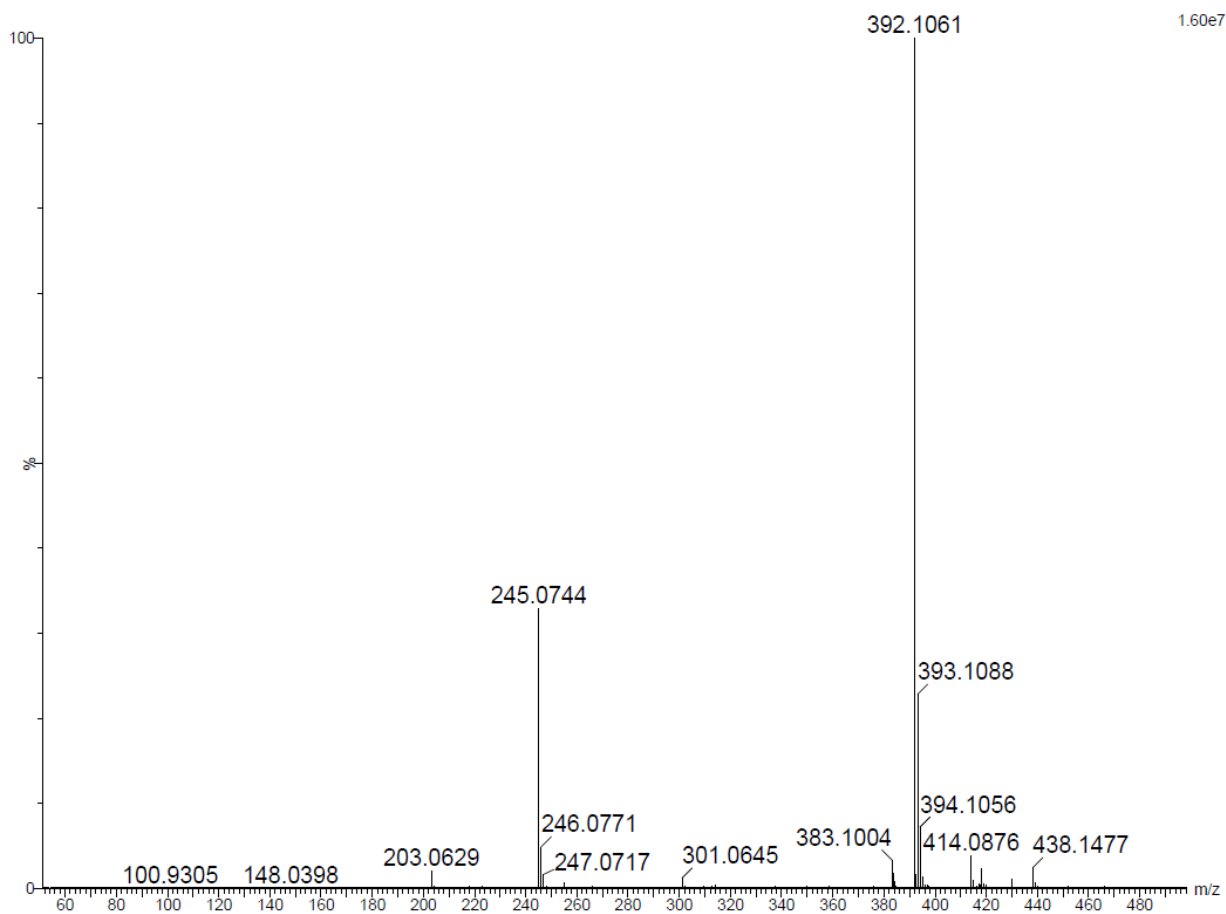

Supplement: s1 [file s1]
